# Supplementary material
Source: publisher figshare collection journal article supplement (https://acs.figshare.com/ndownloader/files/4461781)
Supplement: Supplementary file 1 [file 4461781]

# Supporting Information for

## ( $\beta$ -Diketiminato)(dimethyl)gold(III): Synthesis, Structure and Reactivity

*Ajay Venugopal,<sup>a</sup> Manik K. Ghosh,<sup>a</sup> Hannes Jürgens,<sup>b</sup> Karl W. Törnroos,<sup>c</sup> Ole Swang,<sup>a</sup>*

*Mats Tilset,<sup>b</sup> and Richard H. Heyn<sup>\*a</sup>*

**a) SINTEF Materials and Chemistry, P. O. Box 124, Blindern, 0314 Oslo, Norway, b) Department of Chemistry, University of Oslo, P. O. Box 1033 Blindern, 0315 Oslo, Norway and c) Department of Chemistry, University of Bergen, Allégaten 41, 5007 Bergen, Norway**

F-type basis functions were optimized as described in the article. The functions used for gold are given below (formatted for use with Gaussian 03):

|   |   |       |       |
|---|---|-------|-------|
| F | 2 | 1.00  |       |
|   |   | 2.025 | 0.429 |
|   |   | 0.906 | 0.668 |
| F | 1 | 1.00  |       |
|   |   | 0.405 | 1.0   |
